# Supplementary material for: Exercise-Induced Arrhythmia or Munchhausen Syndrome in a Marathon Runner?
Source: Preprints.org preprint supplement (doi:10.20944/preprints202307.0438.v1), 2023-07-07
Supplement: Supplementary file 1 [file supplementary]

## Table of Contents

|                                                |    |
|------------------------------------------------|----|
| S1. ECG test result.....                       | 1  |
| S2. Holter ECG results.....                    | 1  |
| S3. Echocardiography results.....              | 2  |
| S4. MRI results .....                          | 3  |
| S5. Cardiac electrophysiology study.....       | 8  |
| Table S1. The athlete's personal records. .... | 10 |

## S1. ECG test result

Figure S1. ECG test result

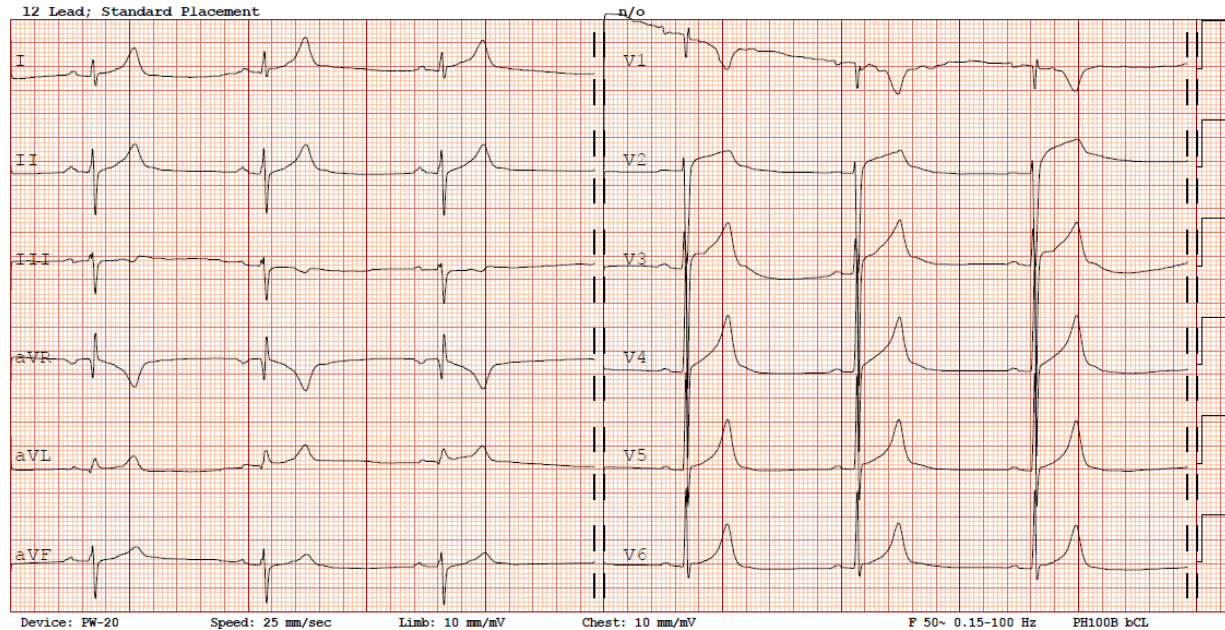

Sinus bradycardia 40/min. Left axis deviation. Left anterior hemiblock. Left ventricular hypertrophy.

Repolarization abnormalities: early repolarization, ST elevations, high T waves

## S2. Holter ECG results

A series of Holter ECGs were performed in 2022-2023, also during competitions. Sinus rhythm averaging 53-55 bpm (31 min-176 max bpm) was observed, with no significant heart rhythm abnormalities. Single ventricular and supraventricular beats were noted. No conduction disturbances, pathological pauses, or specific ST changes were observed. The nocturnal bradycardia min. 31 beats/min. Periodically (especially during high physical activity) there were recordings with a lot of artifacts, preventing correct interpretation.

### S3. Echocardiography results

Video S3. Echocardiography results

A. Parasternal long-axis view

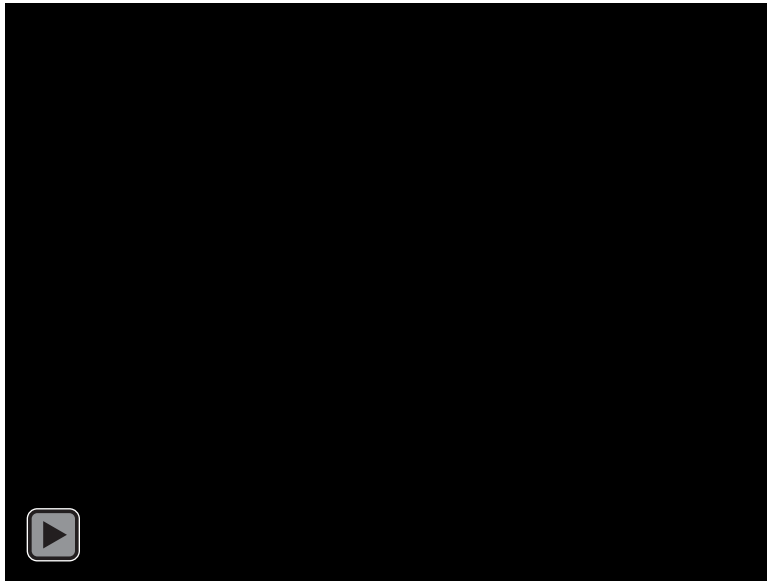

B. Apical 3-Chamber View (Long-Axis View)

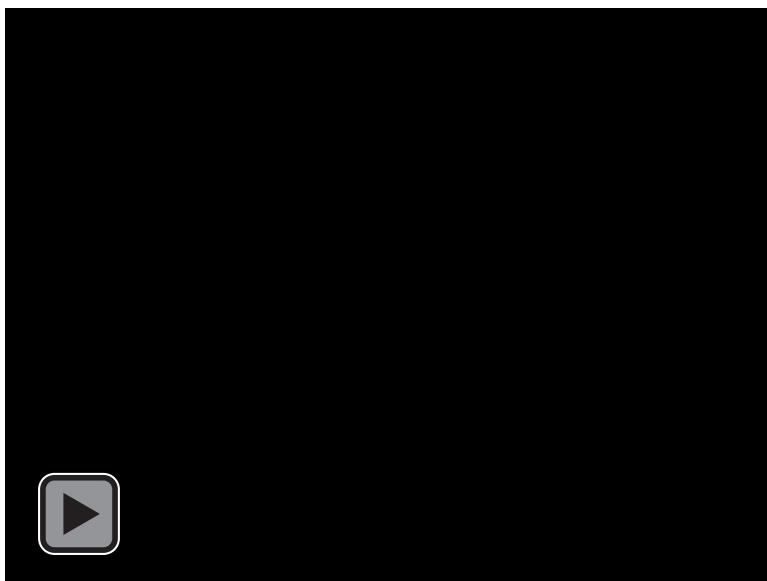

The left ventricle diastolic diameter is 48 mm. The left wall thickness increased to 13-15 mm, especially in the septal region. There is normal muscle contractility. LVEF 65%, E/A 1.9, E/E' 4.4. The right ventricle is not enlarged and exhibits normal contractility. TAPSE 2.9 cm, W' 11cm/sec. The ascending aorta goes from 39 mm to 33 mm in the aortic arch. The valves do not show any significant morphological changes. There is slight mitral regurgitation and minor tricuspid regurgitation. The right ventricular systolic pressure is 25 mmHg. LA area 27 cm<sup>2</sup>, RA area 27 cm<sup>2</sup>.

*Abbreviations:*

*LA – left atrium, LVEF – left ventricle ejection fraction, RA – right atrium*

## S4. MRI results

Figure S4 MRI. results

A. MRI – Stress perfusion CMR without perfusion defects

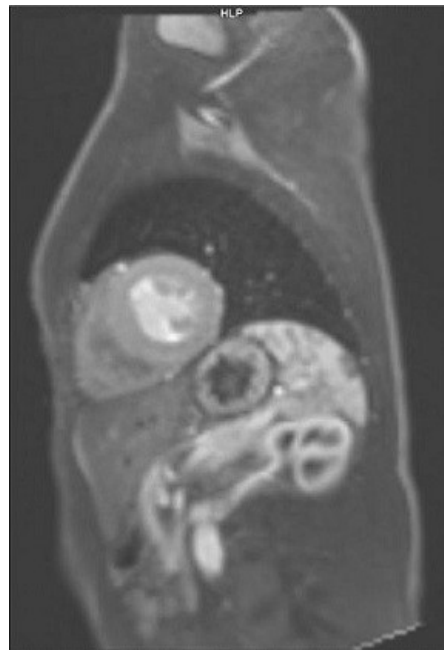



B. MRI – short-axis view without late gadolinium enhancement

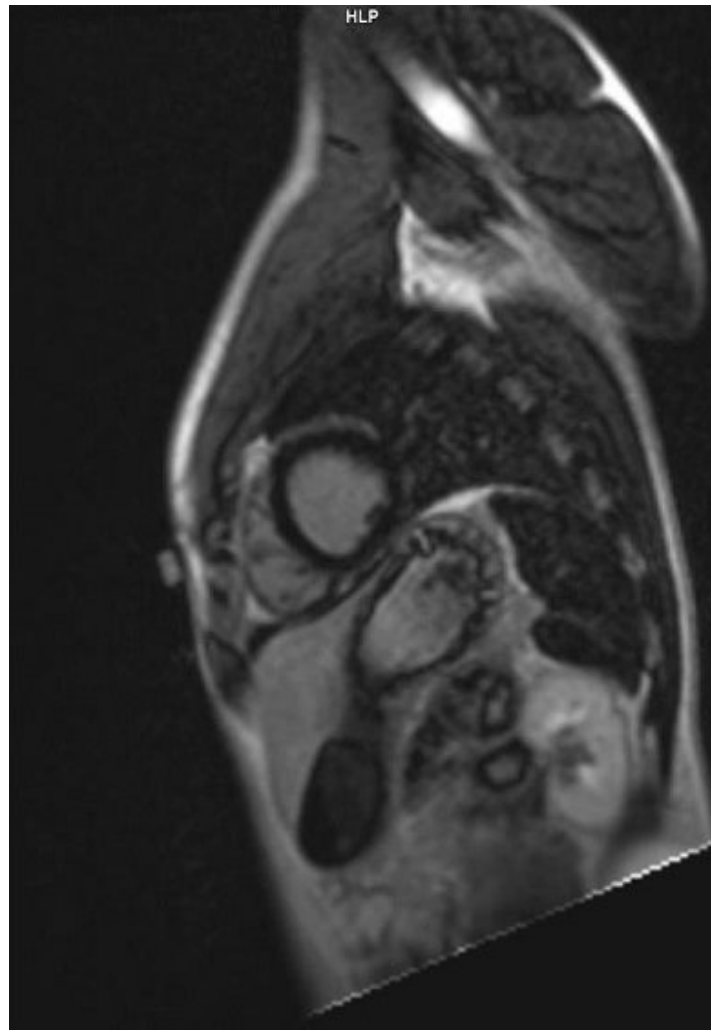

C. MRI – Perfusion normal

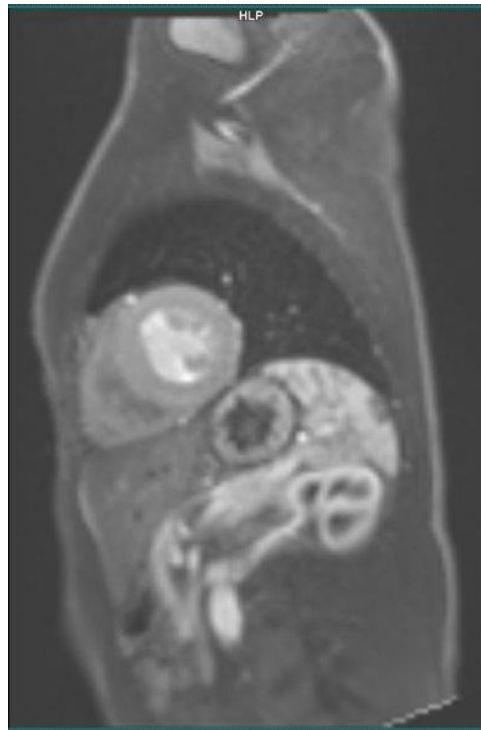

D. MRI – normal 4-chamber view without late gadolinium enhancement

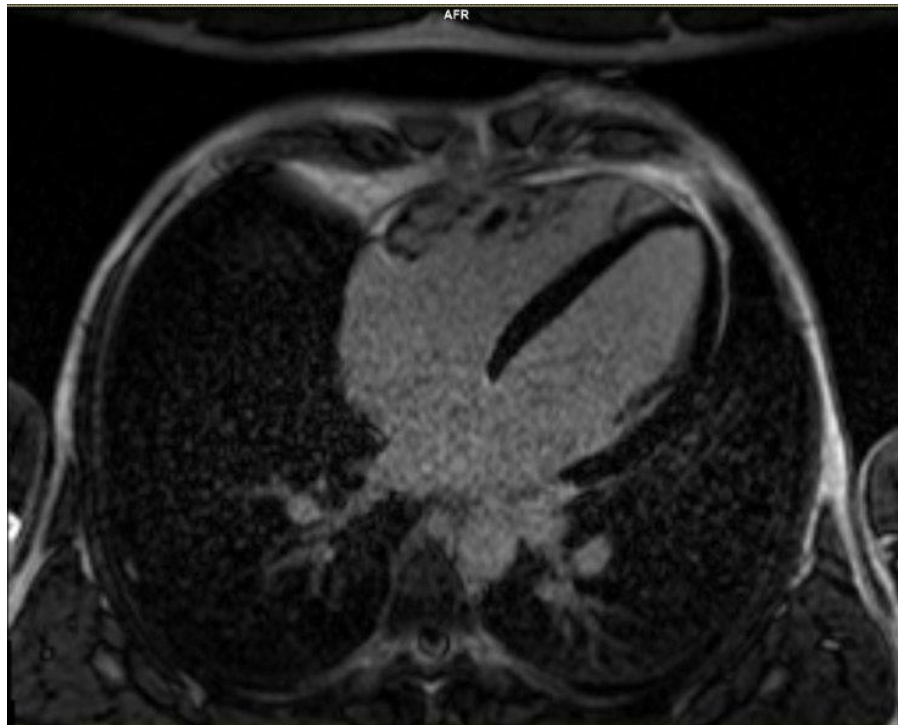

Video S4. MRI results

A. 4-chamber cine images demonstrating no motion abnormality

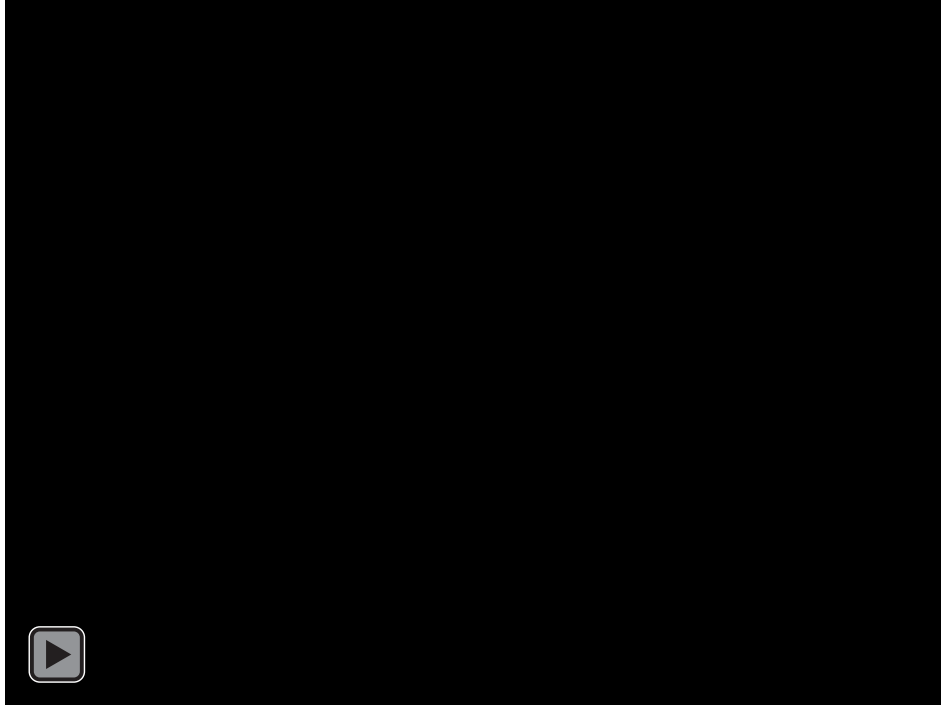

B. MRI – short-axis cine images

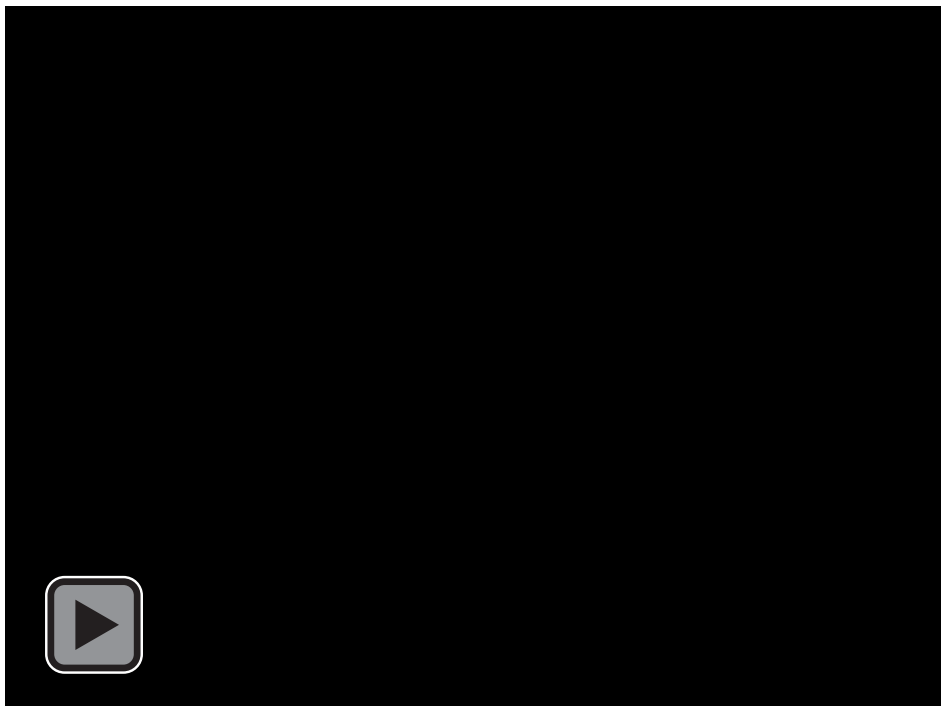

Left ventricle (LV)—the LV has an increased indexed volume. The contractility of the LV muscle (EF=63%) is correct. There are no regional contractility disorders. The basal antero-septal segment is thickened (up to 14 mm, may be partly overestimated due to difficulties in distinguishing the interventricular septum and the marginal band). The remaining left ventricular muscle thickness is assessed as normal. The left ventricular muscle mass increased (mainly due to its enlargement).

Right ventricle (RV)—the RV has an increased indexed volume. There is normal muscle contractility (EF=61%) and no regional contractility disorders. The right ventricular muscle is of normal thickness.

Perfusion assessment (regadenoson administration) —there are no myocardial perfusion losses.

Late post-contrast enhancement (LGE) —thrombi were not visualized in the early phase after administration of the gadolinium contrast agent. There were no areas of LGE.

Both atria are enlarged (LA 29 cm<sup>2</sup>, RA 37 cm<sup>2</sup>).

The heart valves exhibit normal morphology and function, with slight mitral and tricuspid regurgitation.

The aortic root is 43 mm, with normal width of the ascending aorta and pulmonary artery (30 mm).

Pericardium—the pericardium is of normal thickness, and there is a physiological amount of fluid in the pericardial cavity.

Conclusions:

1. The heart cavities are symmetrically enlarged (feature of an athlete's heart).
2. The muscle contraction of both ventricles is normal.
3. The basal antero-septal segment of the LV is thickened (up to 14 mm but can be affected by the presence of the marginal band).
4. There are no areas of left ventricular ischemia during hyperemia.
5. There are no areas of left ventricular fibrosis/necrosis.
6. The aortic root is widened (up to 43 mm).

## S5. Cardiac electrophysiology study

Figure S5. Cardiac electrophysiology study

A: Invasive electrophysiologic study (EPS) in the patient after episodes of fainting during maximum competitive effort preceded by self-reported accelerated heartbeat/palpitations events. Programmed electrical stimulation of the right ventricular apex after intravenous administration of a beat-agonist

S1-S1-S2-S3-S4 400 ms-200 ms -200 ms -200 ms; S2 pacing falls in RV refractory period.

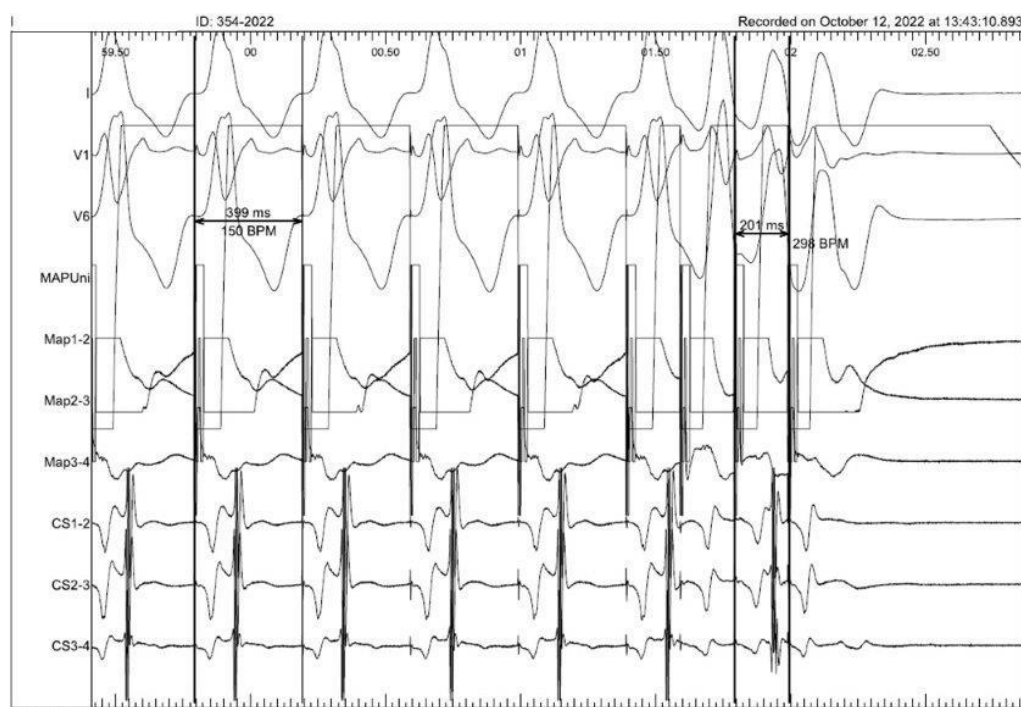



Table S1. The athlete's personal records.

|                     |          |                                       |
|---------------------|----------|---------------------------------------|
| Marathon            | 2:17:22  | Limassol, Cyprus 2014                 |
| Half Marathon       | 1:06:14  | Warsaw, Poland 2014                   |
| 15 km Street        | 47:43    | Warsaw, Poland 2020                   |
| 10 km Street        | 30:07    | Radom, Poland 2014                    |
| 5 km Street         | 14:23    | Grand Junction, USA 2013              |
| 50 km Stadium       | 2:55:47  | Katowice, Poland 2022 (Polish record) |
| 10 km Stadium       | 30:03:78 | Międzyzdroje, Poland 2005             |
| 10 km cross-country | 31:09    | Fayetteville, AR, USA 2010            |
| 8 km cross-country  | 24:49    | Louisville, KY, USA 2010              |
| 5 km Stadium        | 14:30:40 | Białystok, Poland 2004                |
| 3 km Obstacles      | 9:05:91  | Louisville, KY, USA 2011              |
| 3 km Stadium        | 8:21:72  | Warsaw, Poland 2006                   |
| 1 mile Stadium/Hall | 4:14:15  | Indianapolis, IN, USA 2011            |
| 1 mile Street       | 4:18     | Little Rock, AR, USA 2013             |
| 1500 m Stadium      | 3:54:75  | Poznań, Poland 2004                   |
| 1000 m Stadium      | 2:27:05  | Olsztyn, Poland 2005                  |
| 800 m Stadium       | 1:56:30  | Olsztyn, Poland 2005                  |
